# Supplementary material for: Droughts in India from 1981 to 2013 and Implications to Wheat Production
Source: PubMed Central journal article supplement (PMC5353643; doi:10.1038/srep44552), 2017-03-15
Supplement: srep44552-s1.pdf [file srep44552-s1.pdf]

1 **[Scientific Reports]**

2  
3 Supporting Information for

4 **Droughts in India from 1981 to 2013 and Implications to Wheat**  
5 **Production**

6 Xiang Zhang<sup>1,2</sup>, Renee Obringer<sup>3</sup>, Chehan Wei<sup>4</sup>, Nengcheng Chen<sup>1,5,\*</sup>, Dev  
7 Niyogi<sup>2,3</sup>

8 <sup>1</sup> State Key Laboratory of Information Engineering in Surveying, Mapping, and Remote  
9 Sensing (LIESMARS), Wuhan University, Wuhan 430079, China.

10 <sup>2</sup> Department of Agronomy-Crops, Soil, Environmental Science, Purdue University, West  
11 Lafayette, IN 47906, USA.

12 <sup>3</sup>Department of Earth, Atmospheric, and Planetary Sciences, Purdue University, West  
13 Lafayette, IN 47906, USA.

14 <sup>4</sup>Lyles School of Civil Engineering, Purdue University, West Lafayette, IN 47906, USA.

15 <sup>5</sup>Collaborative Innovation Center of Geospatial Technology, Wuhan 430079, China.

16  
17 Corresponding author: Nengcheng Chen (cnc@whu.edu.cn)

18  
19  
20  
21  
22 **Contents of this file**

23 Text

24 Figures S1 to S7

25 Tables S1 to S10

29 Text

30 **Drought determination by SPI/SRI/SSI.** SPI<sup>1</sup>, SRI<sup>2</sup>, and SSI<sup>3</sup> are three  
31 standardized measurements for precipitation, runoff, and soil moisture deficit. For  
32 simplification and spatial comparability, SPI, SRI, and SSI are widely used to  
33 characterize droughts in India as well as world wide<sup>4-7</sup>. For example, SPI  
34 quantifies observed precipitation as a standardized departure from a selected  
35 probability distribution function that models the raw precipitation data. The raw  
36 precipitation data are typically fitted to a gamma distribution, and then  
37 transformed to a normal distribution. The SPI values can be interpreted as the  
38 number of standard deviations by which the observed anomaly deviates from the  
39 long-term mean. In the calculation of SRI and SSI, the standardization procedure  
40 has been rigorously tested by the Kolmogorov–Smirnov test, assuming normal,  
41 log-normal, poisson, exponential, rayleigh, and gamma distribution for runoff and  
42 soil moisture at the alpha level of 0.05. Total 62 grids were included in the test  
43 and the sample size for each grid is 396. It was found that about 73% runoff raw  
44 data was suitable to be represented by the gamma distribution, while none of grid  
45 was suitable to be represented by normal or log-normal distribution. Therefore,  
46 we adopted the gamma function to compute SRI. McKee et al.<sup>1</sup> suggested that  
47 the gamma distribution can also be applied to other variables relevant to drought,  
48 e.g., streamflow or reservoir contents. Shukla and Wood<sup>2</sup> also found gamma  
49 distribution may perform better for low runoff values. In terms of the SSI, the  
50 current practice is to adopt a normal<sup>8</sup> or non-parametric empirical distribution  
51 approach<sup>9</sup>. However, no soil moisture grid was suitable to be represented by any  
52 of the above functions in this study area. This result is probably likely due to the  
53 extensive soil moisture management in the study area (i.e., irrigation). Due to the  
54 highly correlated relationship with runoff, we also adopted the gamma distribution  
55 here in calculating SSI. However, we believe additional research is needed to  
56 find a more appropriate distribution to fit the soil moisture values in this  
57 intensively irrigated area.

58 Index values with corresponding severities are shown in Supplementary  
59 Table S9. Categories D1-D4 were judged as drought events. These thresholds  
60 were adopted from the United States Drought Monitor (USDM) described in  
61 Svoboda et al.<sup>10</sup>. This drought category uses a percentile approach to classify the  
62 severity, as shown in the Table S9. This approach also enables the user to easily  
63 interpret the probability of one drought event in terms of the number of events per  
64 100 years. For example, D0 (abnormally dry) conditions indicate a 21% to 31%  
65 chance of occurring in any given year at a given location, while D1 (moderate  
66 drought) events occur 11% to 20% of the time<sup>10</sup>. It is noted that this classification  
67 system is slightly different from the World Meteorological Organization (WMO)  
68 recommended system by McKee et al.<sup>1</sup>. Both systems use the probability of  
69 occurrence to determine drought severity. But the adopted system can provide  
70 five finer drought categories, compared with the three categories in McKee et al.<sup>1</sup>  
71 In addition, the threshold of 0.35 in VCI also accords with the original study by  
72 Kogan<sup>11</sup>.

73 **Computation of VCI.** VCI is a pixel-wise normalization of NDVI that is useful for  
74 making relative assessment of changes in the NDVI signal by filtering out the  
75 contribution of local geographic features to the spatial variability of NDVI<sup>11</sup>. The  
76 VCI is computed as equation (1).

$$77 \quad VCI_i = \frac{NDVI_i - NDVI_{\min}}{NDVI_{\max} - NDVI_{\min}} \quad (1)$$

78 where  $NDVI_i$  is the smoothed weekly NDVI at each pixel, and  $NDVI_{\max}$  and  
79  $NDVI_{\min}$  are the absolute maximum and minimum NDVI of each pixel,  
80 respectively. The VCI smoothes out non-uniformity in the AVHRR data and it is  
81 an indicator of how weather conditions have influenced the relative vigor of the  
82 vegetation with respect to the ecologically defined limits<sup>12</sup>. The VCI has been  
83 widely evaluated and applied, and was found to be suitable for agricultural  
84 drought<sup>13-15</sup>.

85 The sensitivity analysis used here is similar to that of Anderson et al.<sup>16</sup>: the  
86 absolute sensitivity ( $S_v$ ) of any of the output variable (VCI) to  $\pm X$  uncertainty in  
87 NDVI was assigned as equation (2).

$$88 \quad S_v = |(V_{x+} - V_{x-}) / V_{xr}| \quad (2)$$

89 Where  $V_{x+}$  and  $V_{x-}$  are the estimated VCI variables when the value NDVI are  
90 increased or decreased by  $X$ , and  $V_{xr}$  is the value of the estimated VCI variable  
91 at actual NDVI. Based on this sensitivity analysis, it was found the uncertainty of  
92 NDVI has no impact on the VCI value. Therefore, VCI was relatively immune to  
93 the uncertainty of absolute NDVI values.

94 **Drought Evolution Mechanism.** Generally speaking, the meteorological drought  
95 is often the first kind of drought to occur. A deficit of precipitation during a certain  
96 period of time leads to the shortage of water on the land surface. Along with the  
97 high temperature and wind, potential evapotranspiration increases to consume  
98 more water. When the water balance in the soil disrupts, water on the surface or  
99 subsurface (i.e., streamflow, reservoir, and groundwater) can be transferred into  
100 the soil by irrigation system. Therefore, although the soil moisture deficit occurred  
101 earlier than hydrological water deficit from the theoretical perspective<sup>17,18</sup>, their  
102 occurrence order is usually reversed in irrigation agriculture. This study selected  
103 one of the main wheat production regions in India. The irrigation in this area is  
104 pervasive after the Green Revolution took place in the 1960s. Therefore, in this  
105 study, the soil moisture drought is believed to occur after hydrological drought.  
106 After the soil moisture drought, vegetation is under water-stress. Though it has  
107 limited adaptive functions to decrease the water consumption (i.e., stoma  
108 closure), plant can have permanent damages after a period of water-stress  
109 wilting, which can then result in yield loss. This is the final drought to occur: a  
110 vegetation drought. The above analysis is the theoretical support of this study to

111 investigate these four kinds of droughts at the same time, which is also shown in  
 112 Supplementary Fig. S7. We acknowledge that the above drought evolution  
 113 sequence and time interval are varied in different locations. This also  
 114 demonstrates the necessity to conduct a comprehensive and local-scale drought  
 115 study as a system to gain knowledge to support drought mitigation.

116 **Cross-correlation for drought evolution.** Cross-correlation (or lagged  
 117 correlation) refers to the correlation between two time series shifted in time  
 118 relative to one another. For two time series, data of  $\{x_1, x_2, \dots, x_n\}$  and  $\{y_1, y_2, \dots, y_n\}$ ,  
 119 the cross-correlation coefficient  $r_{xy}(k)$  at lag  $k$  is estimated by:

$$120 \quad r_{xy}(k) = \frac{C_{xy}(k)}{S_x S_y} \quad (3)$$

$$121 \quad C_{xy}(k) = \begin{cases} \frac{1}{n} \sum_{t=1}^{n-k} (x_t - \bar{x})(y_{t+k} - \bar{y}), k = 0, 1, 2, \dots \\ \frac{1}{n} \sum_{t=1}^{n+k} (y_t - \bar{y})(x_{t-k} - \bar{x}), k = -1, -2, \dots \end{cases} \quad (4)$$

$$122 \quad S_x = \sqrt{\frac{1}{n} \sum_{t=1}^n (x_t - \bar{x})^2} \quad (5)$$

$$S_y = \sqrt{\frac{1}{n} \sum_{t=1}^n (y_t - \bar{y})^2}$$

123 It is obvious that if the time lag  $k$  is equal to 0, the cross-correlation became  
 124 the commonly used Pearson correlation. When the value of  $k$  changes, the  
 125 correlation coefficient  $r_{xy}(k)$  changes accordingly. When the correlation  
 126 coefficient reached the maximum value, the time lag  $k$  is regarded as the  
 127 statistical time lag that existed between two variables over time. Shorter time lags  
 128 indicate faster drought evolution processes between two kinds of drought, while  
 129 longer time lags represent long-term evolution processes. When responding to  
 130 drought, it is often useful to know how fast the meteorological drought will evolve  
 131 into a hydrological or vegetation drought. The sample of correlation uses the total  
 132 396 monthly drought data.

133 **Mann-Kendall test with Sen's slope for drought trend analysis.** The Mann-  
 134 Kendall test is based on the correlation between the ranks of a time series and  
 135 their time order. For a time series  $X = \{x_1, x_2, \dots, x_n\}$ , the test statistic  $S$  is given by

$$136 \quad S = \sum_{i=1}^{n-1} \sum_{j=i+1}^n a_{ij} \quad (6)$$

137 where

138 
$$a_{ij} = \text{sign}(x_j - x_i) = \text{sign}(R_j - R_i) = \begin{cases} 1, & x_i < x_j \\ 0, & x_i = x_j \\ -1, & x_i > x_j \end{cases} \quad (7)$$

139 where  $R_i$  and  $R_j$  are the ranks of observations  $x_i$  and  $x_j$  of the time series,  
 140 respectively. As can be seen from equation (6), the test statistic depends only on  
 141 the rank of the observations, rather than their actual values, resulting in a  
 142 distribution-free test statistic. Therefore, the Mann–Kendall trend test is not  
 143 affected by the actual distribution of the data and is less sensitive to outliers. On  
 144 the other hand, parametric trend tests, although more powerful, require the data  
 145 to be normally distributed and are more sensitive to outliers. Therefore, the  
 146 Mann–Kendall test, as well as other non-parametric trend tests, prove more  
 147 suitable for detecting trends in a hydrological time series which are usually  
 148 skewed and may be contaminated with outliers.

149 Under the assumption that the data are independent and identically  
 150 distributed, the mean and variance of the S statistic in equation (6) are given by<sup>19</sup>

151 
$$E(S) = 0 \quad (8)$$

152 
$$V_0(S) = n(n-1)(2n+5)/18 \quad (9)$$

153 where  $n$  is the number of observations. The existence of tied ranks (equal  
 154 observations) in the data results in a reduction of the variance of S to become

155 
$$V_0^*(S) = n(n-1)(2n+5)/18 - \sum_{j=1}^m t_j(t_j-1)(2t_j+5)/18 \quad (10)$$

156 where  $m$  is the number of groups of tied ranks, each with  $t_j$  tied observations.

157 Kendall<sup>19</sup> also showed that the distribution of S tended to normality as the  
 158 number of observations becomes larger. The significance of trends can be tested  
 159 by comparing the standardized variable Zs in equation (11) with the standard  
 160 normal variate at the desired significance level  $\alpha$ , where the subtraction or  
 161 addition of unity in equation (11) is a continuity correction.

162 
$$Z_s = \begin{cases} (S-1)/\sqrt{V_0^*(S)}, & S > 0 \\ 0 \\ (S+1)/\sqrt{V_0^*(S)}, & S < 0 \end{cases} \quad (11)$$

163 Positive values of Zs indicate increasing trends while negative Zs values  
 164 show decreasing trends. In this study, trends were estimated on the different  
 165 drought indices (SPI, SRI, SSI, and VCI) to identify statistically significant  
 166 changes in different drought forms. If a significant trend is found, the rate of  
 167 change can further be calculated using the Sen's slope estimator<sup>20</sup>. The Sen's  
 168 method uses a linear model to estimate the slope of the trend, and the variance  
 169 of the residuals should be constant in time calculated as:

170 
$$Q_i = \frac{X_j - X_k}{j - K}, i = 1, \dots, n \quad (12)$$

171 where  $X_j$  and  $X_k$  are data values at times  $j$  and  $k$  ( $j > k$ ), respectively. If there is  
 172 only one datum in each time period, then  $N = n(n-1)/2$ , where  $n$  is the number of  
 173 time periods. The  $n$  values of  $Q_i$  are ranked from smallest to largest, and the  
 174 median of slope or Sen's slope estimator is computed as:

175 
$$Q_{med} = \begin{cases} Q_{[(n+1)/2]}, & \text{if } n \text{ is odd} \\ \frac{Q_{[n/2]} + Q_{[(n+2)/2]}}{2}, & \text{if } n \text{ is even} \end{cases} \quad (13)$$

176 The  $Q_{med}$  sign reflects data trend, while its value indicates the steepness of the  
 177 trend. This estimator can be computed efficiently, and is insensitive to outliers. It  
 178 can be significantly more accurate than non-robust simple linear regression for  
 179 skewed and heteroskedastic data, and competes well against non-robust least  
 180 squares even for normally distributed data in terms of statistical power.

181 **Yield Anomalies Index (YAI) calculation.** The Yield Anomalies Index (YAI) for  
 182 every year was calculated using the following formula:

183 
$$YAI = (Y - \mu) / \sigma \quad (14)$$

184 where  $Y$  is the crop yield in one certain year,  $\mu$  is the average yield during a long  
 185 term, and  $\sigma$  is the standard deviation of long-term yield.

186  
 187

188 **Figure S1.** Mean (a) SPI-1, (b) SRI-1, (c) SSI-1, and (d) VCI in the study area for  
189 every month from 1981 to 2013 to determine meteorological, hydrological, soil  
190 moisture, and vegetation drought, respectively.

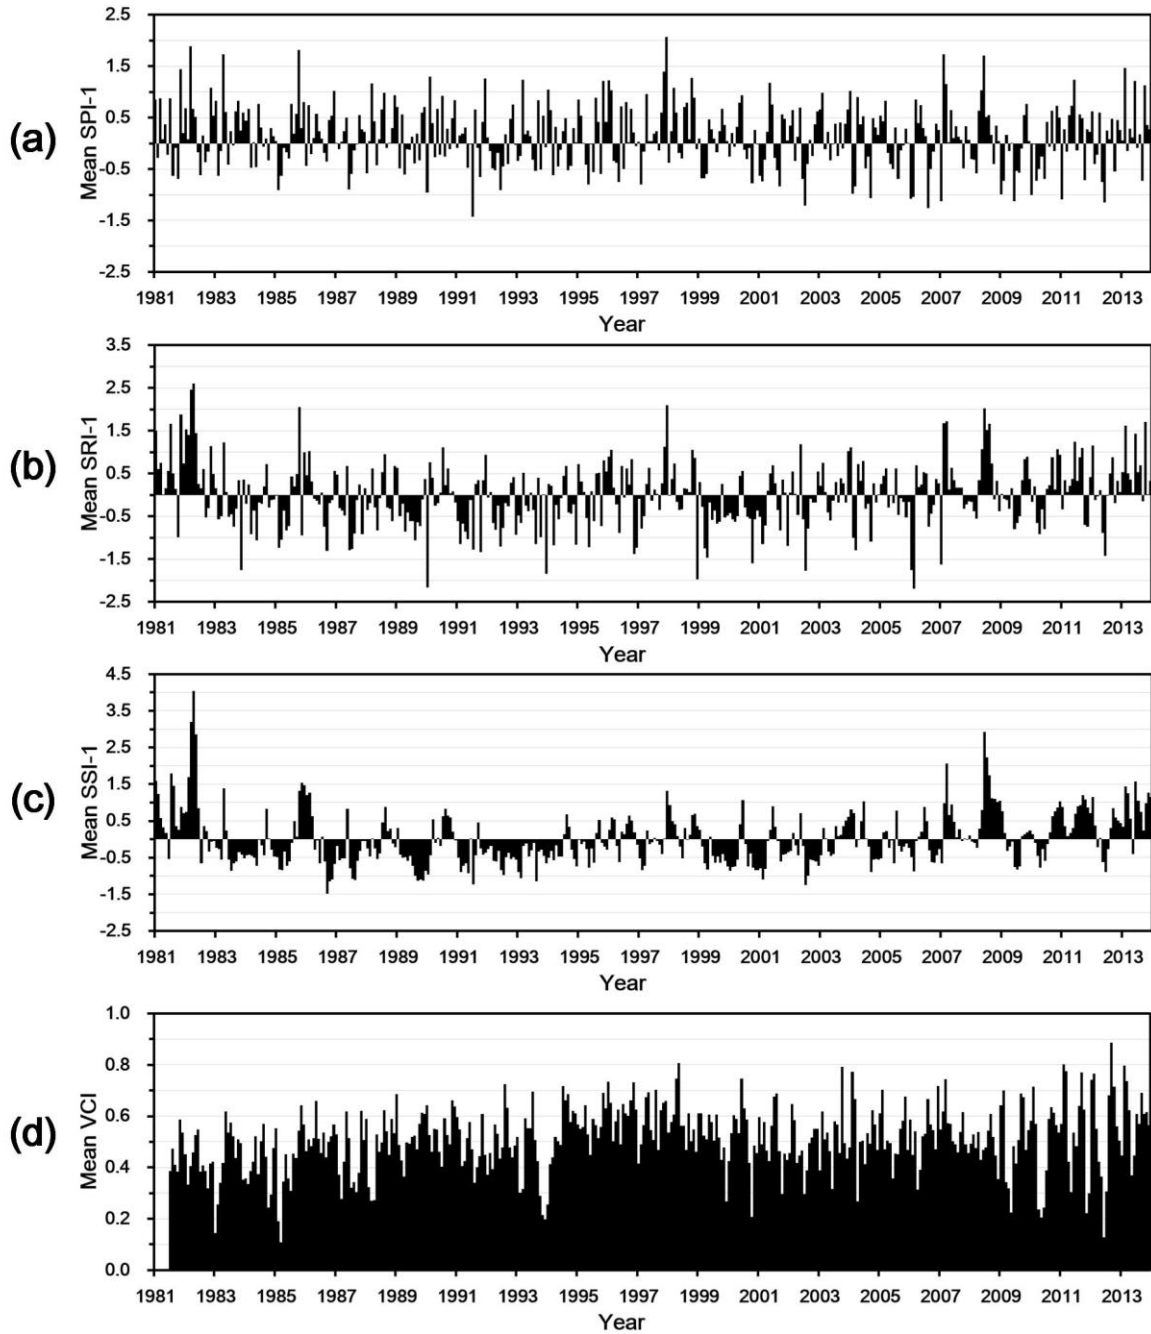

191  
192  
193  
194  
195  
196  
197  
198

199 **Figure S2.** Linear regression of mean areal extent percentage of (a)  
 200 meteorological drought, (b) hydrological drought, (c) soil moisture drought, and (d)  
 201 vegetation drought from 1981-2013.

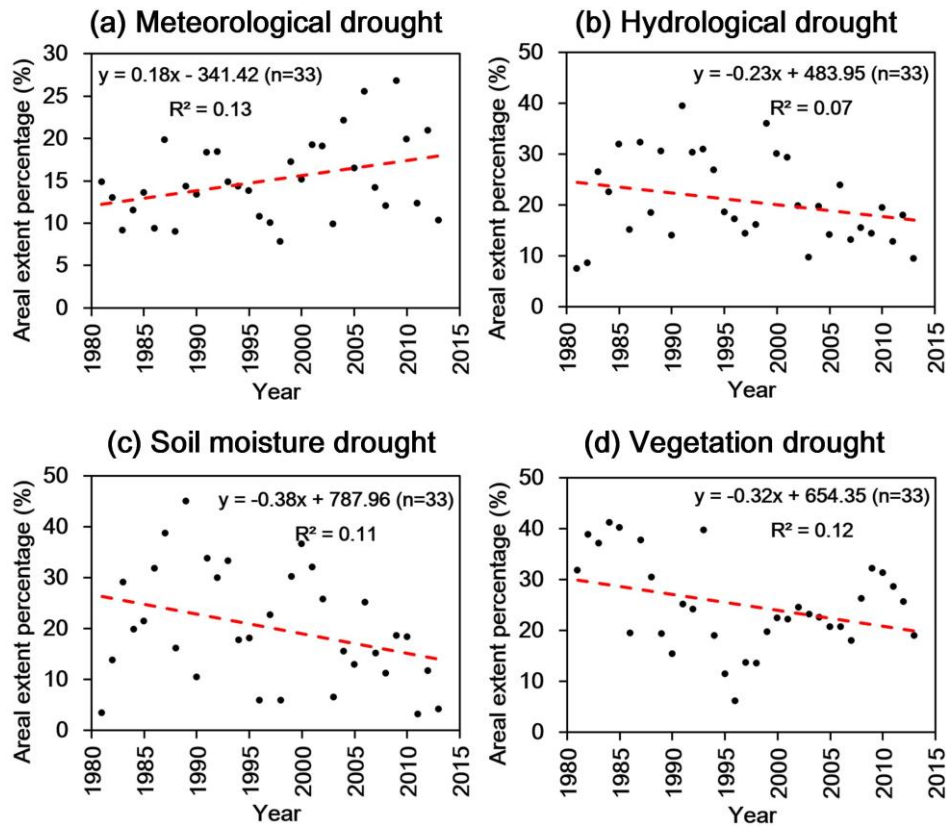

202  
 203  
 204  
 205  
 206  
 207  
 208  
 209  
 210  
 211  
 212  
 213  
 214  
 215  
 216  
 217  
 218  
 219  
 220  
 221



222 **Figure S3.** Latitudinal variations for the temporal extent of droughts in each  
 223 triennium for the seven wheat growth months during 1981–2013. For the middle  
 224 panel, x and y axis values are the same for the left and right panels. The  
 225 latitudinal variations data was calculated and color rendered by Matlab R2014b  
 226 (Version 8.4, URL: <http://www.mathworks.com>) [Software] with the method  
 227 described in the next section. Finally all these maps were organized and labeled  
 228 in the Microsoft Visio Professional 2013 (Version 15.0.4569.1506, URL:  
 229 <https://products.office.com/en-us/visio>) [Software].

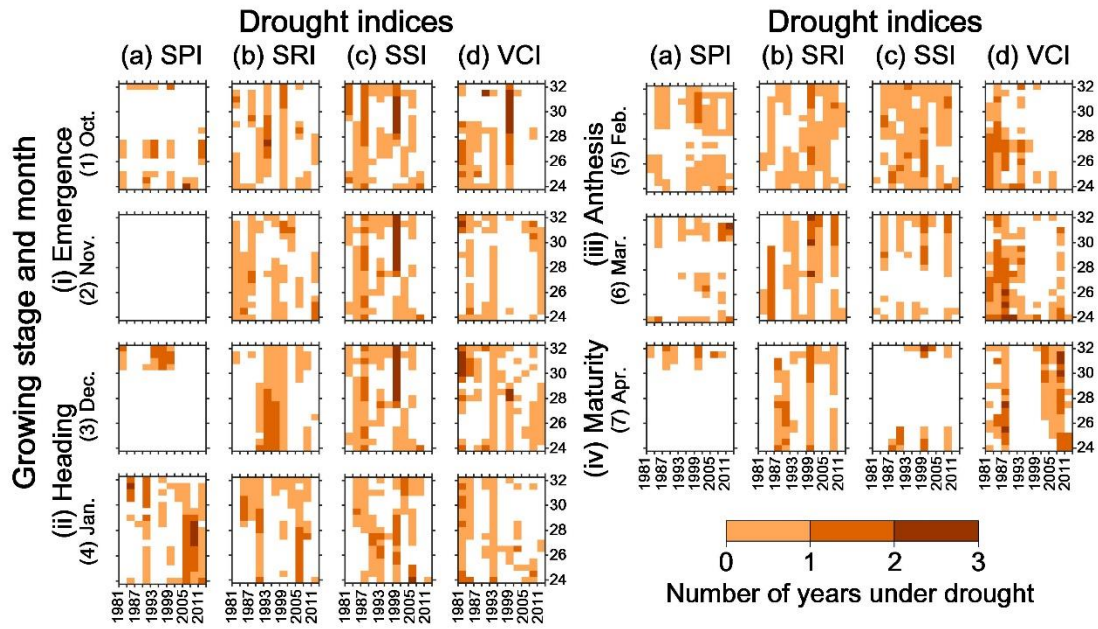

230

231 **Figure S4.** Scattering plot between YAI and the final PADI value for September  
 232 2012 in twelve states of the Midwest. Based on the Kolmogorov–Smirnov test  
 233 (K–S test) at an alpha level of 0.05, YAI is not normally distributed. Therefore,  
 234 Spearman’s rank correlation value ( $r$ ) and linear regression line are given.  
 235 Correlation coefficient ( $r$ ) with spark (\*) indicates  $p < 0.05$  in the significance test.  
 236 From (a) to (f), these  $p$  values are 0.03, 0.00, 0.01, 0.01, 0.00, and 0.00.

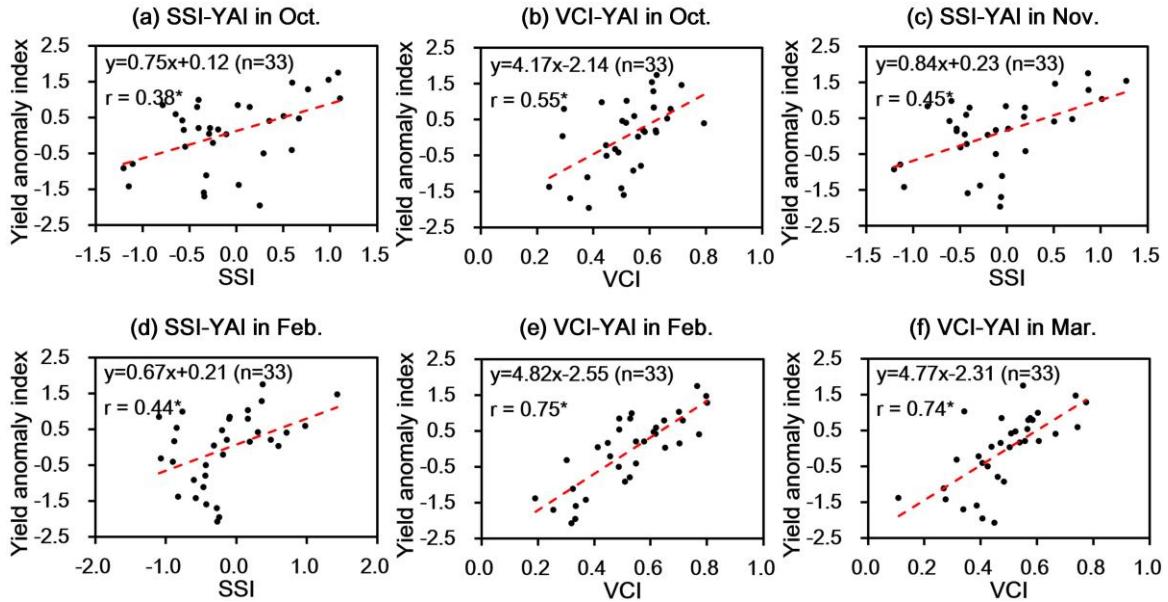

237  
 238  
 239

240 **Figure S5.** Study area with monthly mean precipitation, temperature, land cover, and relative location in India. It was generated by ArcGIS Desktop (Version  
 241 10.2.3348, URL: <http://www.esri.com>) [Software]. Two map layers were used in  
 242 this figure, including administrative boundary layer and land cover layer.  
 243 Administrative boundary and land cover data were obtained from DIVA-GIS (URL:  
 244 <http://www.diva-gis.org/Data>). DIVA-GIS provides free spatial data for  
 245 geographical information system. Precipitation and temperature data were  
 246 retrieved from Yr, which is a joint service by the Norwegian Meteorological  
 247 Institute and the Norwegian Broadcasting Corporation (URL:  
 248 <https://www.yr.no/place/India/>). These data and products are licensed under  
 249 Norwegian license for public data (NLOD; <http://data.norge.no/nlod/en/1.0>) and  
 250 Creative Commons Attribution 3.0 Norway  
 251 (<https://creativecommons.org/licenses/by/3.0/no/>), and they are freely available to  
 252 the public for use, distribution and processing.  
 253

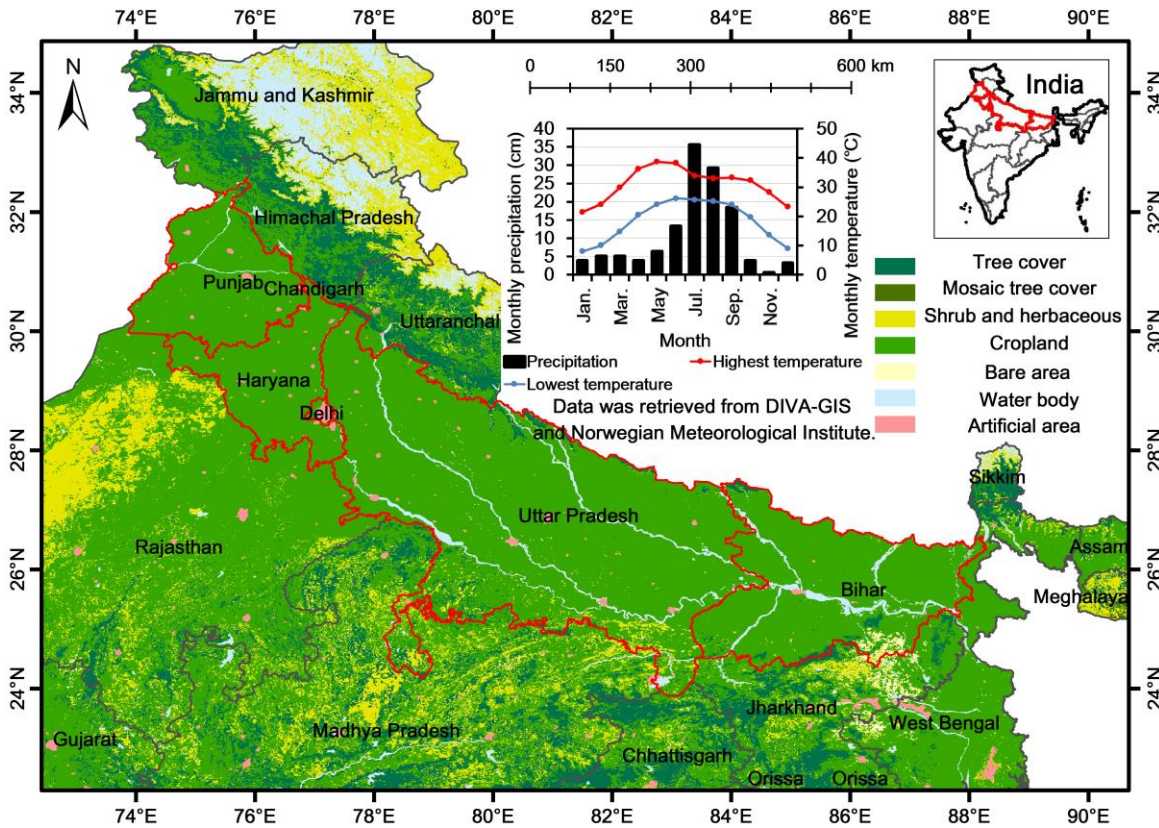

254  
 255  
 256  
 257  
 258  
 259  
 260  
 261

262  
263

**Figure S6.** Total wheat production, area, and mean yield in the study area from 1980 to 2014. The red line is the linear fitting trend of wheat yield.

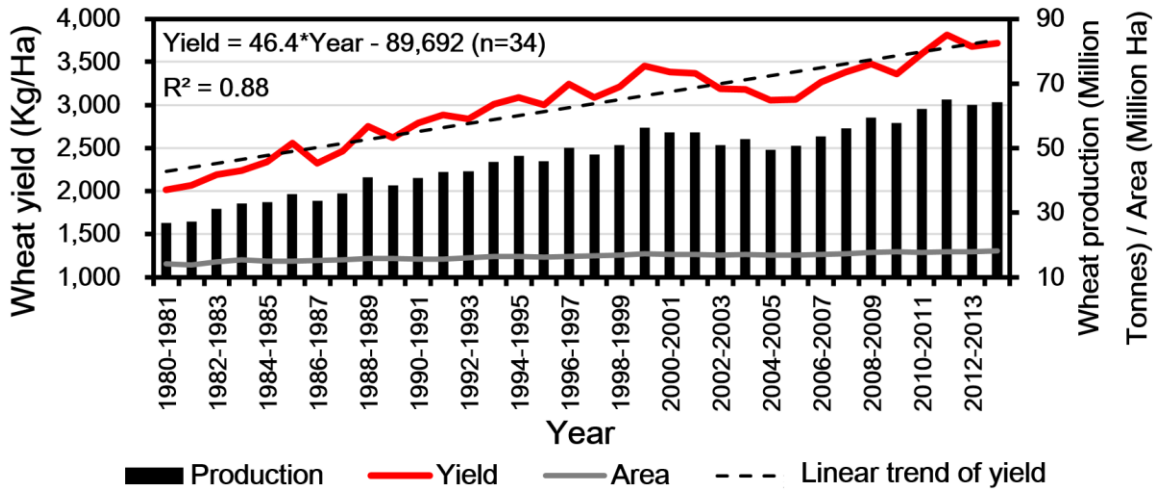

264  
265  
266  
267  
268  
269  
270  
271  
272  
273  
274  
275  
276  
277  
278  
279  
280  
281  
282  
283  
284  
285  
286  
287  
288  
289  
290  
291  
292  
293  
294  
295

296 **Figure S7.** Flowchart of drought evolution mechanism from meteorological, to  
 297 hydrological, to soil moisture, and to vegetation drought.

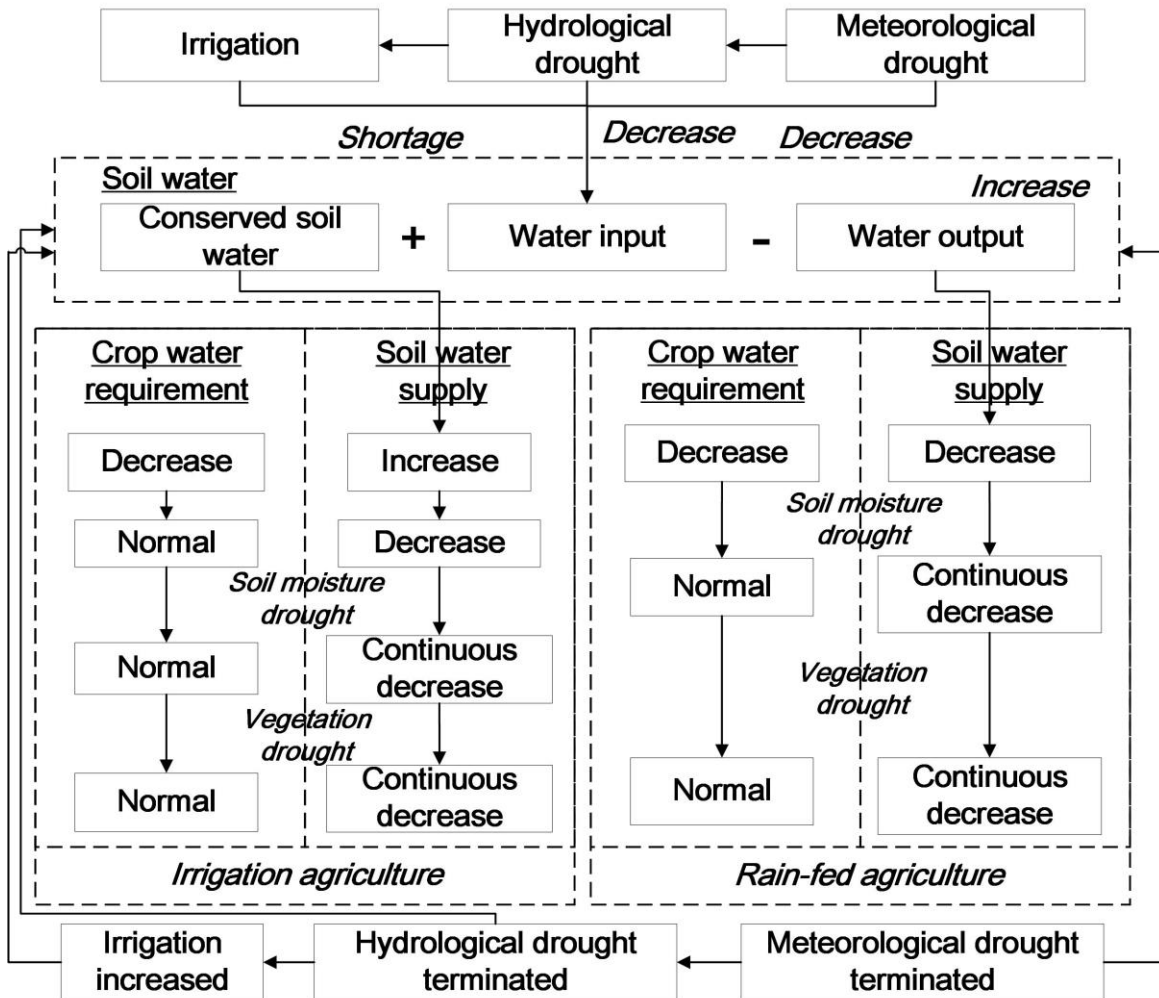

298  
 299  
 300  
 301  
 302  
 303  
 304  
 305  
 306  
 307  
 308  
 309  
 310

311 **Table S1.** Occurrence of meteorological droughts with moderate or higher  
 312 severities estimated using domain-averaged drought indices for every month in  
 313 the crop periods. Years when at least three types of droughts occurred are  
 314 marked in bold.

| Stage       | Emergence |          | Heading  |         | Anthesis |       | Maturity |
|-------------|-----------|----------|----------|---------|----------|-------|----------|
| Year        | October   | November | December | January | February | March | April    |
| <b>1985</b> |           |          |          |         | D1       |       |          |
| <b>1990</b> |           |          |          | D1      |          |       |          |
| <b>1997</b> |           |          |          |         | D1       |       |          |
| 1998        |           |          |          |         |          |       |          |
| <b>2004</b> |           |          |          |         | D1       | D1    |          |
| <b>2006</b> |           |          |          | D1      | D1       |       |          |
| 2007        |           |          |          | D1      |          |       |          |
| 2009        |           |          |          | D1      |          |       |          |
| <b>2010</b> |           |          |          | D1      |          |       |          |
| 2011        |           |          |          | D1      |          |       |          |

315  
 316  
 317  
 318  
 319  
 320  
 321  
 322  
 323  
 324  
 325  
 326  
 327  
 328  
 329  
 330  
 331  
 332  
 333  
 334  
 335  
 336  
 337  
 338

339 **Table S2.** Occurrence of hydrological droughts with moderate or higher  
 340 severities estimated using domain-averaged drought indices for every month in  
 341 the crop periods. Years when at least three types of droughts occurred are  
 342 marked in bold.

| Stage       | Emergence |          | Heading  |         | Anthesis |       | Maturity |
|-------------|-----------|----------|----------|---------|----------|-------|----------|
| Year        | October   | November | December | January | February | March | April    |
| 1981        | D1        |          |          |         |          |       |          |
| 1983        |           | D3       |          |         |          |       |          |
| 1984        |           |          |          |         |          | D1    |          |
| <b>1985</b> |           | D1       |          |         | D1       | D1    |          |
| 1987        |           | D1       |          |         |          |       |          |
| 1989        |           |          |          |         |          |       | D1       |
| <b>1990</b> |           |          |          | D4      |          |       |          |
| 1991        | D2        |          |          |         | D1       |       | D1       |
| 1992        |           |          | D1       |         |          |       | D1       |
| <b>1993</b> | D1        |          | D3       |         |          |       |          |
| 1994        |           |          | D1       |         |          | D1    |          |
| 1996        |           | D2       | D1       |         |          |       |          |
| <b>1997</b> |           |          |          |         |          |       |          |
| 1998        |           |          | D3       |         |          |       |          |
| <b>1999</b> |           |          |          |         |          | D1    | D2       |
| <b>2000</b> | D3        |          |          |         |          |       |          |
| <b>2001</b> |           |          | D1       |         | D1       |       |          |
| <b>2004</b> |           |          |          |         | D1       | D1    |          |
| <b>2006</b> |           |          |          | D3      | D4       |       |          |
| 2007        |           |          |          | D3      |          |       |          |
| <b>2010</b> |           |          |          |         |          |       | D1       |

343  
 344  
 345  
 346  
 347  
 348  
 349  
 350  
 351  
 352

353 **Table S3.** Occurrence of soil moisture droughts with moderate or higher  
 354 severities estimated using domain-averaged drought indices for every month in  
 355 the crop periods. Years when at least three types of droughts occurred are  
 356 marked in bold.

| Stage       | Emergence |          | Heading  |         | Anthesis |       | Maturity |
|-------------|-----------|----------|----------|---------|----------|-------|----------|
| Year        | October   | November | December | January | February | March | April    |
| <b>1985</b> |           |          |          |         | D1       | D1    |          |
| 1986        | D1        | D1       |          |         |          |       |          |
| 1989        | D1        | D1       | D1       |         |          |       |          |
| <b>1990</b> |           |          |          | D1      |          |       |          |
| 1991        |           |          |          |         | D1       |       |          |
| 1992        |           |          |          |         |          |       |          |
| <b>1993</b> |           |          |          | D1      | D1       |       |          |
| <b>1997</b> |           |          |          |         | D1       |       |          |
| <b>1999</b> |           |          |          |         |          |       | D1       |
| <b>2000</b> |           | D1       | D1       | D1      |          |       |          |
| <b>2001</b> |           |          |          |         | D1       | D1    |          |
| <b>2006</b> |           |          |          |         | D1       |       |          |

357  
 358  
 359  
 360  
 361  
 362  
 363  
 364  
 365  
 366  
 367  
 368  
 369  
 370  
 371  
 372  
 373  
 374  
 375  
 376



377 **Table S4.** Occurrence of vegetation droughts with moderate or higher severities  
 378 estimated using domain-averaged drought indices for every month in the crop  
 379 periods. Years when at least three types of droughts occurred are marked in bold.

| Stage | Emergence   |         | Heading  |          | Anthesis |          | Maturity |       |
|-------|-------------|---------|----------|----------|----------|----------|----------|-------|
|       | Year        | October | November | December | January  | February | March    | April |
|       | 1982        | D1      |          |          |          | D1       |          |       |
|       | 1983        |         |          | D1       | D3       | D1       | D1       |       |
|       | 1984        | D2      | D1       |          |          | D1       |          |       |
|       | <b>1985</b> |         |          |          |          | D2       | D3       | D1    |
|       | 1987        |         |          |          |          |          | D1       |       |
|       | 1988        |         |          |          |          | D1       | D1       | D1    |
|       | <b>1993</b> | D1      | D2       | D2       |          | D1       | D1       |       |
|       | 1994        |         |          |          | D2       |          |          |       |
|       | <b>1999</b> |         |          | D1       |          |          |          |       |
|       | <b>2000</b> | D2      |          |          |          |          |          |       |
|       | <b>2001</b> | D1      |          |          |          |          |          |       |
|       | <b>2004</b> |         |          |          |          |          |          | D1    |
|       | <b>2006</b> |         |          |          |          |          |          | D1    |
|       | 2009        |         |          |          |          |          | D1       | D1    |
|       | <b>2010</b> |         |          |          |          |          |          | D2    |
|       | 2011        |         | D2       | D1       |          |          |          |       |

380  
 381  
 382  
 383  
 384  
 385  
 386  
 387  
 388  
 389  
 390  
 391  
 392  
 393  
 394  
 395  
 396  
 397  
 398

399 **Table S5.** Concurrent meteorological, hydrological, soil moisture, and vegetation  
 400 droughts with moderate or higher severities estimated using domain-averaged  
 401 drought indices for every month in the crop periods. They are represented by M,  
 402 H, S, and V, respectively. The symbol of “+” represents the concurrent situation.

| Stage | Emergence |          | Heading  |         | Anthesis |       | Maturity |
|-------|-----------|----------|----------|---------|----------|-------|----------|
| Year  | October   | November | December | January | February | March | April    |
| 1985  |           |          |          |         | M+H+S+V  | H+S+V |          |
| 1990  |           |          |          | M+H+S   |          |       |          |
| 1991  |           |          |          |         | H+S      |       |          |
| 1993  | H+V       |          | H+V      |         | S+V      |       |          |
| 1997  |           |          |          |         | M+S      |       |          |
| 1999  |           |          |          |         |          |       | H+S      |
| 2000  | H+V       |          |          |         |          |       |          |
| 2001  |           |          |          |         | H+S      |       |          |
| 2004  |           |          |          |         | M+H      | M+H   |          |
| 2006  |           |          |          | M+H     | M+H+S    |       |          |
| 2007  |           |          |          | M+H     |          |       |          |
| 2010  |           |          |          |         |          |       | H+V      |

403  
 404  
 405  
 406  
 407  
 408  
 409  
 410  
 411  
 412  
 413  
 414  
 415  
 416  
 417  
 418  
 419  
 420  
 421  
 422  
 423  
 424

425 **Table S6.** Mean duration of meteorological, hydrological, soil moisture, and  
 426 vegetation drought time determined by domain-averaged SPI, SRI, SSI, and VCI  
 427 during 1981-1989, 1990-1999, and 2000-2013, respectively. Ave. is short for  
 428 average duration. Ran. is short for duration range. Std. is short for standard  
 429 deviation. Sample size of each decade is 9, 10, and 10, respectively. Sample  
 430 size (n) for meteorological drought in each decade is 2, 5, and 6. Sample size (n)  
 431 for hydrological drought in each decade is 8, 9, and 7. Sample size (n) for soil  
 432 moisture drought in each decade is 5, 5, and 6. Sample size (n) for vegetation  
 433 drought in each decade is 6, 3, and 7. Units are in months.

| Decade    | Meteorological Drought |       |      | Hydrological Drought |       |      | Soil Moisture Drought |      |      | Vegetation Drought |      |      |
|-----------|------------------------|-------|------|----------------------|-------|------|-----------------------|------|------|--------------------|------|------|
|           | Ave.                   | Ran.  | Std. | Ave.                 | Ran.  | Std. | Ave.                  | Ran. | Std. | Ave.               | Ran. | Std. |
| 1981-1989 | <b>1</b>               | 1-1   | 0    | <b>1.2</b>           | 1-2   | 0.4  | <b>2.8</b>            | 1-6  | 1.9  | <b>1.9</b>         | 1-3  | 0.7  |
| 1990-1999 | <b>1</b>               | 1-1   | 0    | <b>1.2</b>           | 1-2   | 0.4  | <b>1.3</b>            | 1-2  | 0.4  | <b>1.7</b>         | 1-3  | 1.2  |
| 2000-2009 | <b>1.2</b>             | 1-1.5 | 0.3  | <b>1.1</b>           | 1-1.5 | 0.2  | <b>1.4</b>            | 1-2  | 0.5  | <b>1.3</b>         | 1-3  | 0.8  |

434  
 435  
 436  
 437  
 438  
 439  
 440  
 441  
 442  
 443  
 444  
 445  
 446  
 447  
 448  
 449  
 450  
 451  
 452  
 453  
 454  
 455  
 456  
 457  
 458  
 459  
 460

461 **Table S7.** Frequency of meteorological, hydrological, soil moisture, and  
 462 vegetation drought time determined by domain-averaged SPI, SRI, SSI, and VCI  
 463 during 1981-1989, 1990-1999, and 2000-2013, respectively. Units are the  
 464 number of droughts per decade.

| Decades   | Meteorological<br>Drought | Hydrological<br>Drought | Soil Moisture<br>Drought | Vegetation<br>Drought |
|-----------|---------------------------|-------------------------|--------------------------|-----------------------|
| 1981-1989 | 2                         | 13                      | 5                        | 20                    |
| 1990-1999 | 5                         | 21                      | 10                       | 8                     |
| 2000-2009 | 11                        | 11                      | 10                       | 9                     |

465  
 466  
 467  
 468  
 469  
 470  
 471  
 472  
 473  
 474  
 475  
 476  
 477  
 478  
 479  
 480  
 481  
 482  
 483  
 484  
 485  
 486  
 487  
 488  
 489  
 490  
 491  
 492  
 493  
 494  
 495  
 496  
 497  
 498

499 **Table S8.** Mean areal extent of meteorological, hydrological, soil moisture, and  
 500 vegetation drought time determined by pixel level of SPI, SRI, SSI, and VCI  
 501 during 1981-1989, 1990-1999, and 2000-2013, respectively. Ave. is short for  
 502 average areal extent. Ran. is short for areal extent range. Std. is short for  
 503 standard deviation. Sample size (n) in each decade is 9, 10, and 10, respectively.  
 504 Unit is percentage (%).

| Decades   | Meteorological Drought |          |      | Hydrological Drought |           |      | Soil Moisture Drought |          |      | Vegetation Drought |           |      |
|-----------|------------------------|----------|------|----------------------|-----------|------|-----------------------|----------|------|--------------------|-----------|------|
|           | Ave.                   | Ran.     | Std. | Ave.                 | Ran.      | Std. | Ave.                  | Ran.     | Std. | Ave.               | Ran.      | Std. |
| 1981-1989 | <b>12.7</b>            | 9.0-19.8 | 3.5  | <b>21.4</b>          | 7.4-32.2  | 9.7  | <b>24.3</b>           | 3.4-45.0 | 13.0 | <b>32.9</b>        | 19.3-41.2 | 8.5  |
| 1990-1999 | <b>13.9</b>            | 7.8-18.4 | 3.6  | <b>24.3</b>          | 14.0-39.5 | 9.5  | <b>20.7</b>           | 5.8-33.8 | 10.9 | <b>18.7</b>        | 6.1-39.7  | 9.4  |
| 2000-2009 | <b>18.0</b>            | 9.9-26.8 | 5.6  | <b>18.9</b>          | 9.6-30.0  | 6.9  | <b>19.9</b>           | 6.5-36.6 | 9.7  | <b>23.2</b>        | 17.9-32.1 | 3.8  |

505  
 506  
 507  
 508  
 509  
 510  
 511  
 512  
 513  
 514  
 515  
 516  
 517  
 518  
 519  
 520  
 521  
 522  
 523  
 524  
 525  
 526  
 527  
 528  
 529  
 530  
 531  
 532  
 533  
 534  
 535

536 **Table S9.** Ranges of drought indices (SPI, SRI, SSI, and VCI) for various  
 537 drought severities and categories as described in Svoboda et al.<sup>10</sup>.

| Drought Severity    | SPI, SRI,<br>and SSI | VCI          | Category | Percentile<br>Chance |
|---------------------|----------------------|--------------|----------|----------------------|
| Abnormally dry      | -0.50 to -0.79       | 0.45 to 0.36 | D0       | 20 to 30             |
| Moderate drought    | -0.80 to -1.29       | 0.26 to 0.35 | D1       | 10 to 20             |
| Severe drought      | -1.30 to -1.59       | 0.25 to 0.16 | D2       | 5 to 10              |
| Extreme drought     | -1.60 to -1.99       | 0.15 to 0.06 | D3       | 2 to 5               |
| Exceptional drought | -2.00 or less        | 0.00 to 0.05 | D4       | 0 to 2               |

538  
 539  
 540  
 541  
 542  
 543  
 544  
 545  
 546  
 547  
 548  
 549  
 550  
 551  
 552  
 553  
 554  
 555  
 556  
 557  
 558  
 559  
 560  
 561  
 562  
 563  
 564  
 565  
 566  
 567  
 568  
 569

570 **Table S10.** Phenological stages for winter wheat crops (source: Steduto et al.<sup>21</sup>;  
 571 Water Development and Management Unit<sup>22</sup>).

| Stage     | Description                                                 | Date                | Yield response factor |
|-----------|-------------------------------------------------------------|---------------------|-----------------------|
| Emergence | Germination to emergence                                    | October to November | 0.2                   |
| Heading   | From emergence to double ridge                              | December to January | 0.6                   |
| Anthesis  | From double ridge to anthesis                               | February to March   | 0.5                   |
| Maturity  | Includes the grainfilling period, from anthesis to maturity | April               | -                     |

572  
 573  
 574  
 575  
 576  
 577  
 578  
 579  
 580  
 581  
 582  
 583  
 584  
 585  
 586  
 587  
 588  
 589  
 590  
 591  
 592  
 593  
 594  
 595  
 596  
 597  
 598  
 599  
 600  
 601  
 602  
 603  
 604  
 605  
 606

607  
608  
609  
610  
611  
612  
613  
614  
615  
616  
617  
618  
619  
620  
621  
622  
623  
624  
625  
626  
627  
628  
629  
630  
631  
632  
633  
634  
635  
636  
637  
638  
639  
640  
641  
642  
643  
644  
645  
646  
647  
648  
649  
650  
651

## Reference

1. McKee, T. B., Doesken, N. J. & Kleist, J. *The relationship of drought frequency and duration to time scales in Proceedings of the 8th Conference on Applied Climatology*. 179-183 (American Meteorological Society Boston, MA, 1993).
2. Shukla, S. & Wood, A. W. Use of a standardized runoff index for characterizing hydrologic drought. *Geophys. Res. Lett.* **35**, 1-7, doi:10.1029/2007GL032487 (2008).
3. Hao, Z. & AghaKouchak, A. Multivariate standardized drought index: a parametric multi-index model. *Adv. Water Resour.* **57**, 12-18, doi:10.1016/j.advwatres.2013.03.009 (2013).
4. Bhuiyan, C., Singh, R. P. & Kogan, F. N. Monitoring drought dynamics in the Aravalli region (India) using different indices based on ground and remote sensing data. *Int. J. Appl. Earth Obs. Geoinf.* **8**, 289-302, doi:10.1016/j.jag.2006.03.002 (2006).
5. Thomas, T., Nayak, P. C. & Ghosh, N. C. Spatiotemporal analysis of drought characteristics in the bundelkhand region of central India using the standardized precipitation index. *J. Hydrol. Eng.* **20**, doi:10.1061/(asce)he.1943-5584.0001189 (2015).
6. Yadav, R. R., Misra, K. G., Yadava, A. K., Kotlia, B. S. & Misra, S. Tree-ring footprints of drought variability in last similar to 300 years over Kumauni Himalaya, India and its relationship with crop productivity. *Quat. Sci. Rev.* **117**, 113-123, doi:10.1016/j.quascirev.2015.04.003 (2015).
7. AghaKouchak, A. *et al.* Remote sensing of drought: progress, challenges and opportunities. *Rev. Geophys.* **53**, 452-480, doi:10.1002/2014rg000456 (2015).
8. Mishra, V. & Cherkauer, K. A. Retrospective droughts in the crop growing season: Implications to corn and soybean yield in the Midwestern United States. *Agric. For. Meteorol.* **150**, 1030-1045, doi:10.1016/j.agrformet.2010.04.002 (2010).
9. Hao, Z. & AghaKouchak, A. Multivariate standardized drought index: a parametric multi-index model. *Adv. Water. Resour.* **57**, 12-18, doi:10.1016/j.advwatres.2013.03.009 (2013).
10. Svoboda, M. *et al.* The drought monitor. *Bull. Am. Meteorol. Soc.* **83**, 1181-1190, doi:10.1175/1520-0477(2002)083<1181:TDM>2.3.CO;2 (2002).
11. Kogan, F. N. Application of vegetation index and brightness temperature for drought detection, *Adv. Space Res.* **15**, 91-100, doi:10.1016/0273-1177(95)00079-T (1995).
12. Unganai, L. S. & Kogan F. N. Drought monitoring and corn yield estimation in Southern Africa from AVHRR data, *Remote Sens. Environ.* **63**, 219-232, doi:10.1016/S0034-4257(97)00132-6 (1998).
13. Singh, R. P., Roy, S. & Kogan, F. Vegetation and temperature condition indices from NOAA AVHRR data for drought monitoring over India. *Int. J. Remote Sens.* **24**, 4393-4402, doi:10.1080/0143116031000084323 (2003).
14. Jain, S. K., Keshri, R., Goswami, A., Sarkar, A. & Chaudhry, A. identification of drought-vulnerable areas using NOAA AVHRR data. *Int. J. Remote Sens.* **30**, 2653-2668, doi:10.1080/01431160802555788 (2009).



- 652 15. Quiring, S. M. & Ganesh, S. Evaluating the utility of the vegetation condition  
653 index (VCI) for monitoring meteorological drought in Texas. *Agric. For.*  
654 *Meteorol.* **150**, 330-339, doi:10.1016/j.agrformet.2009.11.015 (2010).
- 655 16. Anderson, M. C., Norman, J. M., Diak, G. R., Kustas, W. P. & Mecikalski, J. R.  
656 A two-source time-integrated model for estimating surface fluxes using  
657 thermal infrared remote sensing. *Remote Sens. Environ.* **60**, 195-216, doi:  
658 10.1016/S0034-4257(96)00215-5 (1997).
- 659 17. National Weather Service, What is Drought Why is Drought Important.  
660 <http://www.nws.noaa.gov/os/brochures/climate/Drought2.pdf> (2008) (Data of  
661 access: 21/10/2016)
- 662 18. National Drought Mitigation Center, Types of Drought.  
663 <http://drought.unl.edu/DroughtBasics/TypesofDrought.aspx> (2016) (Data of  
664 access: 21/10/2016)
- 665 19. Kendall, M. G. *Rank Correlation Methods*. 1-272 (Oxford University Press,  
666 1948).
- 667 20. Sen, P. K. Estimates of the regression coefficient based on Kendall's tau. *J.*  
668 *Am. Stat. Assoc.* **63**, 1379-1389 (1968).
- 669 21. Steduto, P., Hsiao, T. C., Fereres, E. & Raes, D. Crop yield response to  
670 water. <http://www.fao.org/docrep/016/i2800e/i2800e00.htm> (2012) (Data of  
671 access: 21/10/2016).
- 672 22. Water Development and Management Unit. Crop Water Information: Wheat.  
673 [http://www.fao.org/nr/water/cropinfo\\_wheat.html](http://www.fao.org/nr/water/cropinfo_wheat.html) (2015) (Data of access:  
674 21/10/2016)
